# Supplementary material
Source: publisher site journal article supplement (https://www.dovepress.com/article/500838)
Supplement: Supplementary file 1 [file get_supplementary_file.php]

# Comprehensive Clinical Evaluation of Rilonacept in the Treatment of Cryopyrin-Associated Periodic Syndromes: A Systematic Review

**Supplementary materials**

**Table S1. Search strategy**

| Online database | No. | Search strategy | Results |
| --- | --- | --- | --- |
| PubMed | #1 | (cryopyrin-associated periodic syndromes OR familial cold autoinflammatory syndrome OR Muckle-Wells syndrome OR chronic infantile neurologic cutaneous and articular OR neonatal-onset multisystem inflammatory disease) [MeSH Terms]) OR (CAPS or FCAS or MWS or CINCA or NOMID) | 18047 |
| #2 | (rilonacept OR Arcalyst OR KPL-914 OR IL-1 trap) OR ((IL-1R1 OR IL-1Ra) NOT (anakinra OR canakinumab)) | 4708 |
| #3 | #1 AND #2 | 54 |
| Ovid/Embase | #1 | ('cryopyrin-associated periodic syndromes' OR 'familial cold autoinflammatory syndrome' OR 'Muckle-Wells syndrome' OR ('chronic infantile neurologic cutaneous and articular') OR 'neonatal-onset multisystem inflammatory disease') OR (CAPS OR FCAS OR MWS OR CINCA OR NOMID) | 20191 |
| #2 | (rilonacept OR Arcalyst OR 'KPL-914' OR 'IL-1 trap') OR (('IL-1R1' OR 'IL-1Ra') NOT (anakinra OR canakinumab)) | 10448 |
| #3 | #1 AND #2 | 323 |
| The Cochrane Library | #1 | MeSH descriptor: [Cryopyrin-Associated Periodic Syndromes] explode all trees | 23 |
| #2 | (cryopyrin-associated periodic syndromes):ti,ab,kw OR (familial cold autoinflammatory syndrome):ti,ab,kw OR (Muckle-Wells syndrome):ti,ab,kw OR (chronic infantile neurologic cutaneous and articular):ti,ab,kw OR (neonatal-onset multisystem inflammatory disease):ti,ab,kw | 42 |
| #3 | (CAPS):ti,ab,kw OR (FCAS):ti,ab,kw OR (MWS):ti,ab,kw OR (CINCA):ti,ab,kw OR (NOMID):ti,ab,kw | 1550 |
| #4 | #1 OR #2 OR #3 | 1573 |
| #5 | (rilonacept):ti,ab,kw OR (Arcalyst):ti,ab,kw OR (KPL-914):ti,ab,kw OR (IL-1 trap):ti,ab,kw | 99 |
| #6 | (IL-1Ra):ti,ab,kw OR (IL-1R1):ti,ab,kw | 759 |
| #7 | (anakinra):ti,ab,kw OR (canakinumab):ti,ab,kw | 844 |
| #8 | #5 OR #6 NOT #7 | 798 |
| #9 | #4 AND #8 in Trials | 8 |
| CNKI Database | #1 | Chinese: (SU%=(冷吡啉相关的周期性综合征+冷炎素相关周期性综合征+隐热蛋白相关周期综合征+cryopyrin) + (家族性寒冷性自身炎症综合征+家族性寒冷性荨麻疹) + (穆克勒-韦尔斯综合征) + (慢性婴儿神经皮肤关节+慢性炎症性神经、皮肤、关节综合征) + (新生儿期起病的多系统疾病+新生儿多系统炎症性疾病)) OR (TKA=(冷吡啉相关的周期性综合征+冷炎素相关周期性综合征+隐热蛋白相关周期综合征+cryopyrin) + (家族性寒冷性自身炎症综合征+家族性寒冷性荨麻疹) + (穆克勒-韦尔斯综合征) + (慢性婴儿神经皮肤关节+慢性炎症性神经、皮肤、关节综合征) + (新生儿期起病的多系统疾病+新生儿多系统炎症性疾病))  English: (SU%=(cryopyrin-associated periodic syndrome + cryopyrin-related periodic syndrome + cryopyrinopathy-related periodic syndrome + cryopyrin) + (familial cold autoinflammatory syndrome + familial cold urticaria) + (Muckle-Wells syndrome) + (chronic infantile neurological cutaneous and articular syndrome + chronic inflammatory neurological, cutaneous, and articular syndrome) + (neonatal-onset multisystem inflammatory disease + neonatal multisystem inflammatory disease)) OR (TKA=(cryopyrin-associated periodic syndrome + cryopyrin-related periodic syndrome + cryopyrinopathy-related periodic syndrome + cryopyrin) + (familial cold autoinflammatory syndrome + familial cold urticaria) + (Muckle-Wells syndrome) + (chronic infantile neurological cutaneous and articular syndrome + chronic inflammatory neurological, cutaneous, and articular syndrome) + (neonatal-onset multisystem inflammatory disease + neonatal multisystem inflammatory disease)) | 77 |
| #2 | Chinese: (SU%=('利纳西普' + '列洛西普' + '利洛希普' + 'rilonacept' + 'IL-1 陷阱') OR (TKA=('利纳西普' + '列洛西普' + '利洛希普' + 'rilonacept' + 'IL-1 陷阱') OR (TKA=('IL-1受体拮抗剂' + 'IL-1受体阻断剂' + '白介素-1受体') NOT (TKA=卡那单抗 OR TKA='阿那白滞素' + '安纳白介素')))  English: (SU%=('Rilonacept '[*The word has multiple expressions in Chinese*] + 'IL-1 trap') OR (TKA=('Rilonacept' + 'Rilonacept' + 'Rilonacept' + 'rilonacept' + 'IL-1 trap')) OR (TKA=('IL-1 receptor antagonist' + 'IL-1 receptor blocker' + 'Interleukin-1 receptor') NOT (TKA=Canakinumab OR TKA='Anakinra' + 'Anakinra'))) | 840 |
| #3 | #1 AND #2 | 3 |
| Wanfang Database | #1 | Chinese: 题名或关键词:("冷吡啉相关的周期性综合征"OR"冷炎素相关周期性综合征"OR"隐热蛋白相关周期综合征"OR"cryopyrin") OR ("家族性寒冷性自身炎症综合征"OR"家族性寒冷性荨麻疹") OR ("穆克勒-韦尔斯综合征") OR ("慢性婴儿神经皮肤关节"OR"慢性炎症性神经、皮肤、关节综合征") OR ("新生儿期起病的多系统疾病"OR"新生儿多系统炎症性疾病") or 摘要:("冷吡啉相关的周期性综合征"OR"冷炎素相关周期性综合征"OR"隐热蛋白相关周期综合征"OR"cryopyrin") OR ("家族性寒冷性自身炎症综合征"OR"家族性寒冷性荨麻疹") OR ("穆克勒-韦尔斯综合征") OR ("慢性婴儿神经皮肤关节"OR"慢性炎症性神经、皮肤、关节综合征") OR ("新生儿期起病的多系统疾病"OR"新生儿多系统炎症性疾病")  English: Title or Keywords:("Cryopyrin-associated periodic syndrome" OR "Cryopyrin-related periodic syndrome" OR "Cryopyrinopathy-related periodic syndrome" OR "cryopyrin") OR ("Familial cold autoinflammatory syndrome" OR "Familial cold urticaria") OR ("Muckle-Wells syndrome") OR ("Chronic infantile neurological cutaneous and articular syndrome" OR "Chronic inflammatory neurological, cutaneous, and articular syndrome") OR ("Neonatal-onset multisystem inflammatory disease" OR "Neonatal multisystem inflammatory disease") OR Abstract:  ("Cryopyrin-associated periodic syndrome" OR "Cryopyrin-related periodic syndrome" OR "Cryopyrinopathy-related periodic syndrome" OR "cryopyrin") OR ("Familial cold autoinflammatory syndrome" OR "Familial cold urticaria") OR ("Muckle-Wells syndrome") OR ("Chronic infantile neurological cutaneous and articular syndrome" OR "Chronic inflammatory neurological, cutaneous, and articular syndrome") OR ("Neonatal-onset multisystem inflammatory disease" OR "Neonatal multisystem inflammatory disease") | 260 |
| #2 | Chinese: 主题:("利纳西普" OR "列洛西普" OR "利洛希普" OR "rilonacept" OR "IL-1 陷阱") or 题名或关键词:("利纳西普" OR "列洛西普" OR "利洛希普" OR "rilonacept" OR "IL-1 陷阱" or (("IL-1受体拮抗剂" OR "IL-1受体阻断剂" OR "白介素-1受体") not ("卡那单抗" OR "阿那白滞素" OR "安纳白介素"))) or 摘要:("利纳西普" OR "列洛西普" OR "利洛希普" OR "rilonacept" OR "IL-1 陷阱" or (("IL-1受体拮抗剂" OR "IL-1受体阻断剂" OR "白介素-1受体") not ("卡那单抗" OR "阿那白滞素" OR "安纳白介素")))  English: Subject: ("Rilonacept" [*The word has multiple expressions in Chinese*] OR "IL-1 trap") OR Title or Keywords: ("Rilonacept" [*The word has multiple expressions in Chinese*] OR "IL-1 trap") OR "IL-1 trap" OR (("IL-1 receptor antagonist" OR "IL-1 receptor blocker" OR "Interleukin-1 receptor") NOT ("Canakinumab" OR "Anakinra" [The word has two expressions in Chinese]))) OR Abstract: ("Rilonacept" [*The word has multiple expressions in Chinese*] OR "IL-1 trap" OR (("IL-1 receptor antagonist" OR "IL-1 receptor blocker" OR "Interleukin-1 receptor") NOT ("Canakinumab" OR "Anakinra" OR "Anakinra"))) | 732 |
| #3 | #1 AND #2 | 12 |
| VIP Database | #1 | Chinese: M=冷吡啉相关的周期性综合征 OR 冷炎素相关周期性综合征 OR 隐热蛋白相关周期综合征 OR cryopyrin OR 家族性寒冷性自身炎症综合征 OR 家族性寒冷性荨麻疹 OR 穆克勒-韦尔斯综合征 OR 慢性婴儿神经皮肤关节 OR 慢性炎症性神经、皮肤、关节综合征 OR 新生儿期起病的多系统疾病 OR 新生儿多系统炎症性疾病  English: M = Cryopyrin-associated periodic syndrome OR Cryopyrin-related periodic syndrome OR Cryopyrinopathy-related periodic syndrome OR cryopyrin OR Familial cold autoinflammatory syndrome OR Familial cold urticaria OR Muckle-Wells syndrome OR Chronic infantile neurological cutaneous and articular syndrome OR Chronic inflammatory neurological, cutaneous, and articular syndrome OR Neonatal-onset multisystem inflammatory disease OR Neonatal multisystem inflammatory disease | 2556 |
| #2 | Chinese: (M=利纳西普 OR 列洛西普 OR 利洛希普 OR rilonacept OR IL-1 陷阱) OR ((M=IL-1受体拮抗剂 OR IL-1受体阻断剂 OR 白介素-1受体) NOT (M=卡那单抗 OR 阿那白滞素 OR 安纳白介素))  English: (M = Rilonacept [*The word has multiple expressions in Chinese*] OR IL-1 trap) OR ((M = IL-1 receptor antagonist OR IL-1 receptor blocker OR Interleukin-1 receptor) NOT (M = Canakinumab OR Anakinra [*The word has two expressions in Chinese*])) | 53110 |
| #3 | #1 AND #2 | 25 |
